# Supplementary material for: Unique lanthanide frameworks with 63 topology based on 1,5-naphthalenedisulfonate and 1H-imidazo[4,5-f][1,10]-phenanthroline: syntheses, crystal structure, photoluminescence, and white light emission
Source: Royal Society of Chemistry journal article supplement (doi:10.1039/c5ce01302j), 2015-01-01
Supplement: c5ce01302j1.pdf [file c5ce01302j1.pdf]

## Supporting Information

### Table of Contents

1. Selected bond lengths [ $\text{\AA}$ ] and angles [ $^\circ$ ] for complexes **1-6** (Table S1).
2. The lifetimes of Eu(III) in  $\text{Dy}_{0.80}\text{Eu}_{0.20}$ ,  $\text{Gd}_{0.90}\text{Eu}_{0.10}$  and  $\text{Pr}_{0.80}\text{Eu}_{0.20}$  doped complexes (Table S2).
3. The PXRD patterns for complexes **1-6** and the  $\text{Gd}_{0.90}\text{Eu}_{0.10}$ ,  $\text{Pr}_{0.80}\text{Eu}_{0.20}$  and  $\text{Dy}_{0.80}\text{Eu}_{0.20}$  doped complexes (Figure S1).
4. 3D structure by the hydrogen bonds (Figure S2).
5. The TGA curves of complexes **1-6** (Figure S3).
6. The CIE chromaticity diagram of complexes **1, 4-6** (Figure S4).
7. Decay profile of Sm(III) in complex **2** (Figure S5).
8. Decay profile of Eu(III) in complex **3** (Figure S6).
9. Decay profile of Eu(III) in  $\text{Dy}_{0.80}\text{Eu}_{0.20}$ ,  $\text{Gd}_{0.90}\text{Eu}_{0.10}$  and  $\text{Pr}_{0.80}\text{Eu}_{0.20}$  doped complexes (Figure S7).

**Table S1** Selected bond lengths [ $\text{\AA}$ ] and angles [ $^\circ$ ] for complexes **1- 6**

| <b>1</b>        |           |                  |            |
|-----------------|-----------|------------------|------------|
| Pr(1)-O(4)      | 2.376(3)  | Pr(1)-O(10)      | 2.423(3)   |
| Pr(1)-O(7)      | 2.384(3)  | Pr(1)-O(1)       | 2.391(3)   |
| Pr(1)-N(1)      | 2.642(3)  | Pr(1)-N(2)       | 2.654(3)   |
| Pr(1)-N(6)      | 2.649(3)  | Pr(1)-N(5)       | 2.675(3)   |
| O(4)-Pr(1)-O(7) | 97.04(11) | O(4)-Pr(1)-O(10) | 91.55(10)  |
| O(4)-Pr(1)-O(1) | 144.31(9) | O(7)-Pr(1)-O(10) | 141.93(11) |
| O(7)-Pr(1)-O(1) | 95.89(10) | O(1)-Pr(1)-O(10) | 98.39(10)  |
| O(4)-Pr(1)-N(1) | 75.93(10) | O(4)-Pr(1)-N(2)  | 77.52(10)  |
| O(7)-Pr(1)-N(1) | 78.19(10) | O(7)-Pr(1)-N(2)  | 140.08(10) |

|                  |            |                  |            |
|------------------|------------|------------------|------------|
| O(1)-Pr(1)-N(1)  | 74.41(9)   | O(1)-Pr(1)-N(2)  | 71.29(10)  |
| O(10)-Pr(1)-N(1) | 139.72(11) | O(10)-Pr(1)-N(2) | 77.98(11)  |
| O(4)-Pr(1)-N(6)  | 138.63(10) | O(4)-Pr(1)-N(5)  | 76.88(9)   |
| O(7)-Pr(1)-N(6)  | 75.80(12)  | O(7)-Pr(1)-N(5)  | 72.53(10)  |
| O(1)-Pr(1)-N(6)  | 76.90(10)  | O(1)-Pr(1)-N(5)  | 138.81(9)  |
| O(10)-Pr(1)-N(6) | 73.42(12)  | O(10)-Pr(1)-N(5) | 73.52(10)  |
| N(1)-Pr(1)-N(6)  | 138.64(10) | N(1)-Pr(1)-N(5)  | 136.77(10) |
| N(1)-Pr(1)-N(2)  | 62.04(10)  | N(6)-Pr(1)-N(5)  | 62.00(10)  |
| N(6)-Pr(1)-N(2)  | 133.01(11) | N(2)-Pr(1)-N(5)  | 140.76(10) |

---

**2**

---

|                  |            |                  |            |
|------------------|------------|------------------|------------|
| Sm(1)-O(4)       | 2.330(4)   | Sm(1)-O(10)      | 2.379(5)   |
| Sm(1)-O(7)       | 2.337(5)   | Sm(1)-O(1)       | 2.354(4)   |
| Sm(1)-N(1)       | 2.601(5)   | Sm(1)-N(2)       | 2.608(5)   |
| Sm(1)-N(6)       | 2.603(5)   | Sm(1)-N(5)       | 2.633(5)   |
| O(4)-Sm(1)-O(7)  | 97.53(17)  | O(4)-Sm(1)-O(10) | 91.41(17)  |
| O(4)-Sm(1)-O(1)  | 143.99(14) | O(7)-Sm(1)-O(10) | 141.61(16) |
| O(7)-Sm(1)-O(1)  | 95.47(16)  | O(1)-Sm(1)-O(10) | 98.85(16)  |
| O(4)-Sm(1)-N(1)  | 75.58(16)  | O(4)-Sm(1)-N(2)  | 77.03(16)  |
| O(7)-Sm(1)-N(1)  | 77.79(16)  | O(7)-Sm(1)-N(2)  | 140.83(16) |
| O(1)-Sm(1)-N(1)  | 74.62(15)  | O(1)-Sm(1)-N(2)  | 71.76(16)  |
| O(10)-Sm(1)-N(1) | 140.42(17) | O(10)-Sm(1)-N(2) | 77.56(17)  |
| O(4)-Sm(1)-N(6)  | 139.50(16) | O(4)-Sm(1)-N(5)  | 76.24(16)  |
| O(7)-Sm(1)-N(6)  | 75.82(18)  | O(7)-Sm(1)-N(5)  | 72.67(16)  |
| O(1)-Sm(1)-N(6)  | 76.33(16)  | O(1)-Sm(1)-N(5)  | 139.77(16) |
| O(10)-Sm(1)-N(6) | 73.33(19)  | O(10)-Sm(1)-N(5) | 73.43(17)  |
| N(1)-Sm(1)-N(6)  | 138.24(18) | N(1)-Sm(1)-N(5)  | 135.56(17) |
| N(1)-Sm(1)-N(2)  | 63.21(17)  | N(6)-Sm(1)-N(5)  | 63.56(18)  |
| N(6)-Sm(1)-N(2)  | 132.29(18) | N(2)-Sm(1)-N(5)  | 139.61(17) |

---

**3**

---

|                  |            |                  |            |
|------------------|------------|------------------|------------|
| Eu(1)-O(4)       | 2.317(5)   | Eu(1)-O(10)      | 2.356(5)   |
| Eu(1)-O(7)       | 2.324(5)   | Eu(1)-O(1)       | 2.347(5)   |
| Eu(1)-N(1)       | 2.587(6)   | Eu(1)-N(2)       | 2.594(6)   |
| Eu(1)-N(6)       | 2.590(6)   | Eu(1)-N(5)       | 2.622(6)   |
| O(4)-Eu(1)-O(7)  | 97.46(19)  | O(4)-Eu(1)-O(10) | 91.5(2)    |
| O(4)-Eu(1)-O(1)  | 143.89(17) | O(7)-Eu(1)-O(10) | 141.37(19) |
| O(7)-Eu(1)-O(1)  | 95.43(18)  | O(1)-Eu(1)-O(10) | 99.13(17)  |
| O(4)-Eu(1)-N(1)  | 75.78(18)  | O(4)-Eu(1)-N(2)  | 76.82(19)  |
| O(7)-Eu(1)-N(1)  | 77.52(19)  | O(7)-Eu(1)-N(2)  | 141.03(19) |
| O(1)-Eu(1)-N(1)  | 74.34(17)  | O(1)-Eu(1)-N(2)  | 72.02(18)  |
| O(10)-Eu(1)-N(1) | 140.9(2)   | O(10)-Eu(1)-N(2) | 77.6(2)    |
| O(4)-Eu(1)-N(6)  | 139.41(18) | O(4)-Eu(1)-N(5)  | 76.58(18)  |
| O(7)-Eu(1)-N(6)  | 76.0(2)    | O(7)-Eu(1)-N(5)  | 72.47(18)  |

|                  |           |                  |            |
|------------------|-----------|------------------|------------|
| O(1)-Eu(1)-N(6)  | 76.53(18) | O(1)-Eu(1)-N(5)  | 139.53(18) |
| O(10)-Eu(1)-N(6) | 73.0(2)   | O(10)-Eu(1)-N(5) | 73.27(19)  |
| N(1)-Eu(1)-N(6)  | 138.1(2)  | N(1)-Eu(1)-N(5)  | 135.64(19) |
| N(1)-Eu(1)-N(2)  | 63.64(19) | N(6)-Eu(1)-N(5)  | 63.2(2)    |
| N(6)-Eu(1)-N(2)  | 132.3(2)  | N(2)-Eu(1)-N(5)  | 139.6(2)   |

---

**4**

---

|                  |            |                  |            |
|------------------|------------|------------------|------------|
| Gd(1)-O(4)       | 2.308(4)   | Gd(1)-O(10)      | 2.355(4)   |
| Gd(1)-O(7)       | 2.315(4)   | Gd(1)-O(1)       | 2.324(3)   |
| Gd(1)-N(1)       | 2.577(4)   | Gd(1)-N(2)       | 2.583(5)   |
| Gd(1)-N(6)       | 2.579(5)   | Gd(1)-N(5)       | 2.621(4)   |
| O(4)-Gd(1)-O(7)  | 97.84(14)  | O(4)-Gd(1)-O(10) | 91.39(14)  |
| O(4)-Gd(1)-O(1)  | 143.78(13) | O(7)-Gd(1)-O(10) | 141.81(14) |
| O(7)-Gd(1)-O(1)  | 94.99(13)  | O(1)-Gd(1)-O(10) | 99.09(13)  |
| O(4)-Gd(1)-N(1)  | 75.40(13)  | O(4)-Gd(1)-N(2)  | 77.16(14)  |
| O(7)-Gd(1)-N(1)  | 77.50(14)  | O(7)-Gd(1)-N(2)  | 141.20(14) |
| O(1)-Gd(1)-N(1)  | 74.58(13)  | O(1)-Gd(1)-N(2)  | 71.72(14)  |
| O(10)-Gd(1)-N(1) | 140.52(15) | O(10)-Gd(1)-N(2) | 76.98(15)  |
| O(4)-Gd(1)-N(6)  | 139.62(14) | O(4)-Gd(1)-N(5)  | 76.12(13)  |
| O(7)-Gd(1)-N(6)  | 75.45(15)  | O(7)-Gd(1)-N(5)  | 72.68(13)  |
| O(1)-Gd(1)-N(6)  | 76.46(14)  | O(1)-Gd(1)-N(5)  | 140.10(13) |
| O(10)-Gd(1)-N(6) | 73.70(16)  | O(10)-Gd(1)-N(5) | 73.80(13)  |
| N(1)-Gd(1)-N(6)  | 138.01(15) | N(1)-Gd(1)-N(5)  | 134.96(14) |
| N(1)-Gd(1)-N(2)  | 63.93(15)  | N(6)-Gd(1)-N(5)  | 63.79(14)  |
| N(6)-Gd(1)-N(2)  | 132.06(16) | N(2)-Gd(1)-N(5)  | 139.47(14) |

---

**5**

---

|                  |            |                  |            |
|------------------|------------|------------------|------------|
| Dy(1)-O(4)       | 2.283(3)   | Dy(1)-O(10)      | 2.320(3)   |
| Dy(1)-O(7)       | 2.291(3)   | Dy(1)-O(1)       | 2.302(3)   |
| Dy(1)-N(1)       | 2.549(4)   | Dy(1)-N(2)       | 2.558(4)   |
| Dy(1)-N(6)       | 2.555(4)   | Dy(1)-N(5)       | 2.593(3)   |
| O(4)-Dy(1)-O(7)  | 98.33(12)  | O(4)-Dy(1)-O(10) | 91.30(12)  |
| O(4)-Dy(1)-O(1)  | 143.63(11) | O(7)-Dy(1)-O(10) | 141.37(12) |
| O(7)-Dy(1)-O(1)  | 94.62(11)  | O(1)-Dy(1)-O(10) | 99.43(12)  |
| O(4)-Dy(1)-N(1)  | 75.41(11)  | O(4)-Dy(1)-N(2)  | 76.78(12)  |
| O(7)-Dy(1)-N(1)  | 77.42(12)  | O(7)-Dy(1)-N(2)  | 141.60(12) |
| O(1)-Dy(1)-N(1)  | 74.51(11)  | O(1)-Dy(1)-N(2)  | 72.07(12)  |
| O(10)-Dy(1)-N(1) | 141.05(12) | O(10)-Dy(1)-N(2) | 77.02(12)  |
| O(4)-Dy(1)-N(6)  | 140.12(11) | O(4)-Dy(1)-N(5)  | 76.18(11)  |
| O(7)-Dy(1)-N(6)  | 75.45(13)  | O(7)-Dy(1)-N(5)  | 72.84(11)  |
| O(1)-Dy(1)-N(6)  | 76.09(11)  | O(1)-Dy(1)-N(5)  | 140.19(11) |
| O(10)-Dy(1)-N(6) | 73.38(14)  | O(10)-Dy(1)-N(5) | 73.38(12)  |
| N(1)-Dy(1)-N(6)  | 137.76(13) | N(1)-Dy(1)-N(5)  | 134.85(12) |
| N(1)-Dy(1)-N(2)  | 64.41(12)  | N(6)-Dy(1)-N(5)  | 64.26(12)  |

|                  |            |                  |            |
|------------------|------------|------------------|------------|
| N(6)-Dy(1)-N(2)  | 131.64(13) | N(2)-Dy(1)-N(5)  | 138.99(12) |
| <b>6</b>         |            |                  |            |
| Tb(1)-O(4)       | 2.294(3)   | Tb(1)-O(10)      | 2.336(3)   |
| Tb(1)-O(7)       | 2.304(3)   | Tb(1)-O(1)       | 2.318(3)   |
| Tb(1)-N(1)       | 2.564(4)   | Tb(1)-N(2)       | 2.574(4)   |
| Tb(1)-N(6)       | 2.574(4)   | Tb(1)-N(5)       | 2.599(4)   |
| O(4)-Tb(1)-O(7)  | 98.25(12)  | O(4)-Tb(1)-O(10) | 91.31(12)  |
| O(4)-Tb(1)-O(1)  | 143.64(10) | O(7)-Tb(1)-O(10) | 141.70(12) |
| O(7)-Tb(1)-O(1)  | 94.72(11)  | O(1)-Tb(1)-O(10) | 99.20(11)  |
| O(4)-Tb(1)-N(1)  | 75.43(11)  | O(4)-Tb(1)-N(2)  | 76.74(11)  |
| O(7)-Tb(1)-N(1)  | 77.22(11)  | O(7)-Tb(1)-N(2)  | 141.15(12) |
| O(1)-Tb(1)-N(1)  | 74.59(10)  | O(1)-Tb(1)-N(2)  | 71.96(12)  |
| O(10)-Tb(1)-N(1) | 140.92(12) | O(10)-Tb(1)-N(2) | 77.14(12)  |
| O(4)-Tb(1)-N(6)  | 139.88(12) | O(4)-Tb(1)-N(5)  | 76.13(11)  |
| O(7)-Tb(1)-N(6)  | 75.61(13)  | O(7)-Tb(1)-N(5)  | 72.87(12)  |
| O(1)-Tb(1)-N(6)  | 76.31(11)  | O(1)-Tb(1)-N(5)  | 140.23(11) |
| O(10)-Tb(1)-N(6) | 73.38(14)  | O(10)-Tb(1)-N(5) | 73.66(11)  |
| N(1)-Tb(1)-N(6)  | 137.93(13) | N(1)-Tb(1)-N(5)  | 134.73(11) |
| N(1)-Tb(1)-N(2)  | 64.16(12)  | N(6)-Tb(1)-N(5)  | 64.08(12)  |
| N(6)-Tb(1)-N(2)  | 131.95(12) | N(2)-Tb(1)-N(5)  | 139.23(12) |

Table S2 The lifetimes ( $\tau$ ) of Eu(III) in Dy<sub>0.80</sub>Eu<sub>0.20</sub>, Gd<sub>0.90</sub>Eu<sub>0.10</sub> and Pr<sub>0.80</sub>Eu<sub>0.20</sub> doped complexes.

| Complex           | Dy <sub>0.80</sub> Eu <sub>0.20</sub> | Gd <sub>0.90</sub> Eu <sub>0.10</sub> | Pr <sub>0.80</sub> Eu <sub>0.20</sub> |
|-------------------|---------------------------------------|---------------------------------------|---------------------------------------|
| Lifetime value/ms | 0.348                                 | 0.339                                 | 0.202                                 |

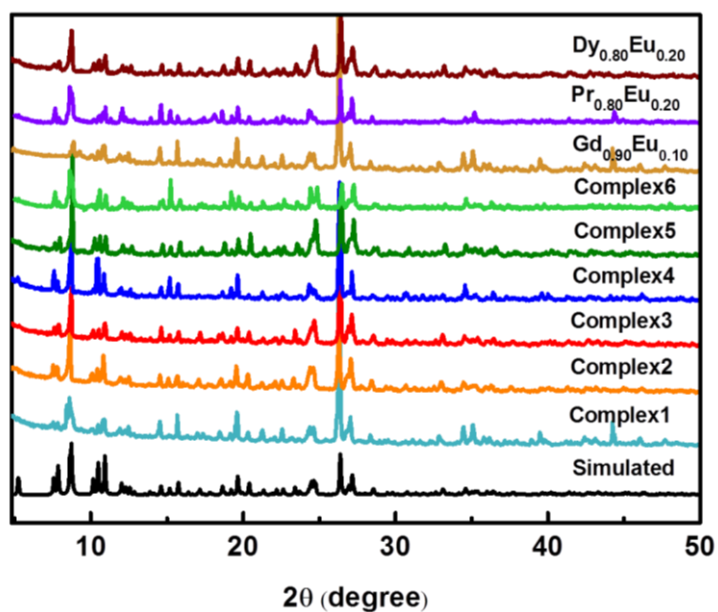

Fig. S1 The PXRD patterns for **1-6** and the  $\text{Gd}_{0.90}\text{Eu}_{0.10}$ ,  $\text{Pr}_{0.80}\text{Eu}_{0.20}$  and  $\text{Dy}_{0.80}\text{Eu}_{0.20}$  doped complexes.

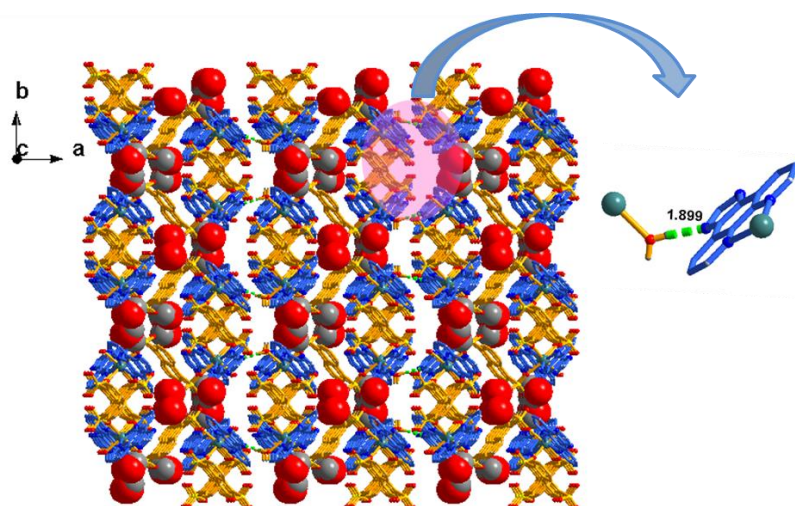

Fig. S2 3D supermolecule structure by hydrogen bonds. The free water molecules present in the cavity.

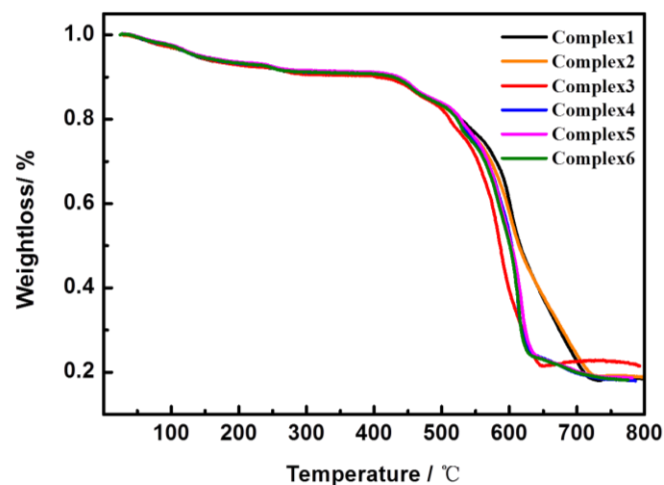

Fig. S3 The TGA curves of **1-6**.

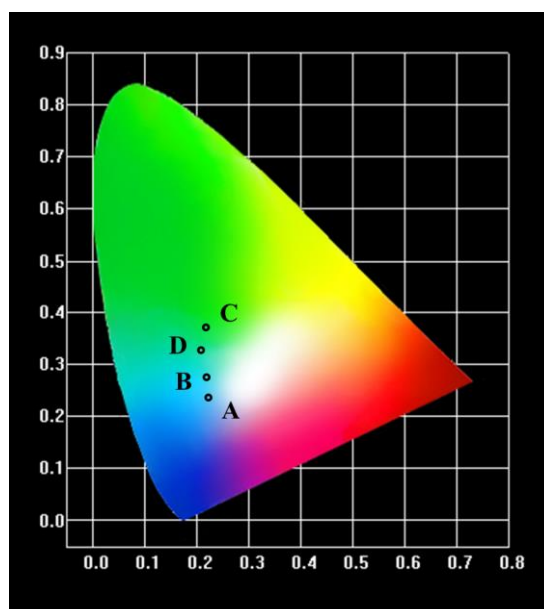

Fig. S4 The CIE chromaticity diagram of complexes **1, 4-6** (A(0.218,0.231) for **1**, B(0.211, 0.288) for **4**, C(0.211, 0.374) for **5** and D(0.208, 0.340) for **6**).

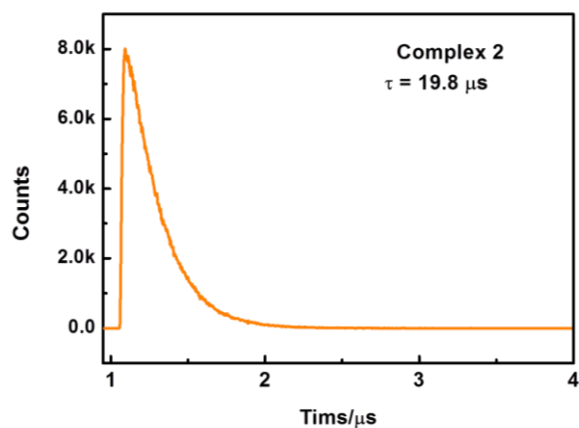

Fig. S5 Decay profile of Sm(III) in complex **2**.

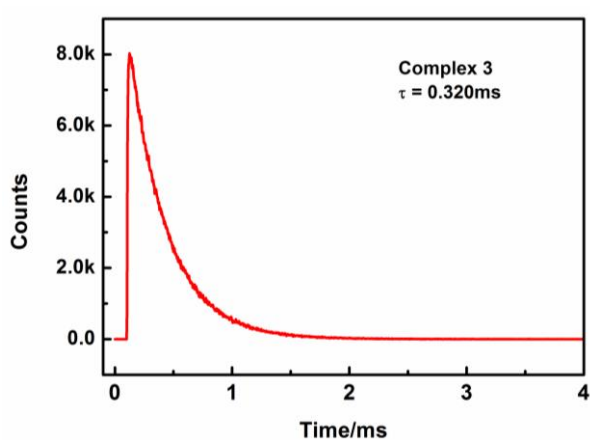

Fig. S6 Decay profile of Eu(III) in complex **3**.

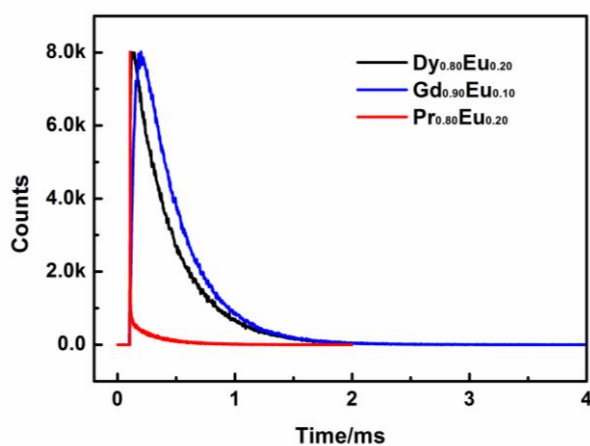

Fig. S7 Decay profile of Eu(III) in  $\text{Dy}_{0.80}\text{Eu}_{0.20}$ ,  $\text{Gd}_{0.90}\text{Eu}_{0.10}$  and  $\text{Pr}_{0.80}\text{Eu}_{0.20}$  doped complexes.
